October 2010

Vol. 167, No. 10:1145-1288

THE AMERICAN JOURNAL OF PSYCHIATRY

# THE AMERICAN JOURNAL OF PSYCHIATRY

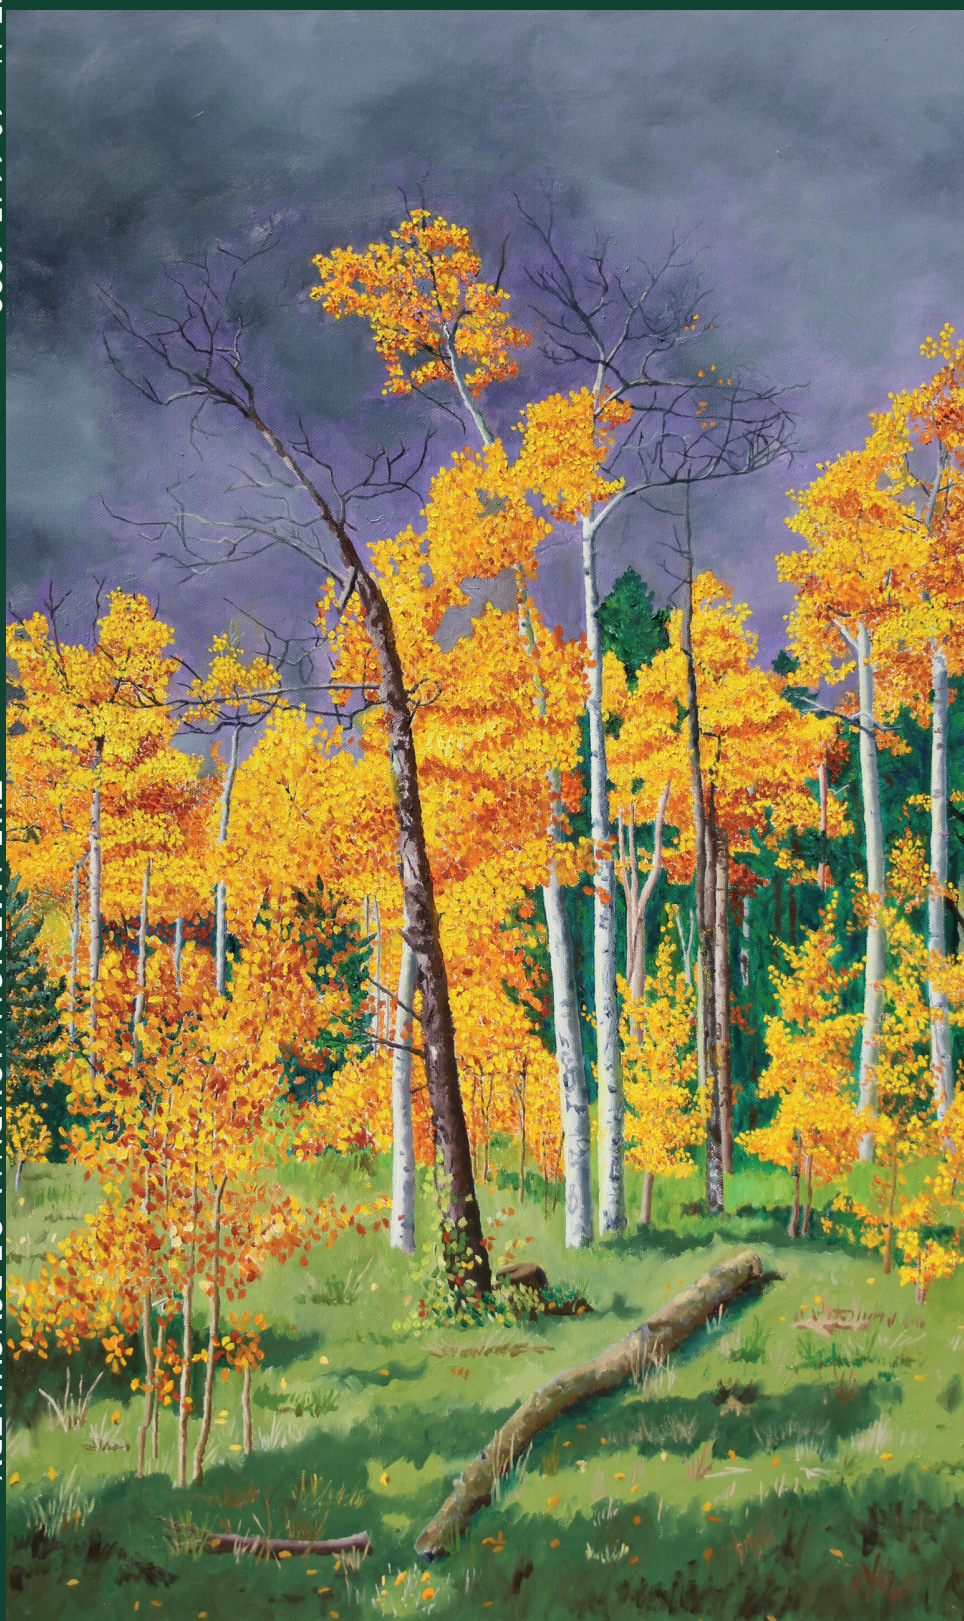

**The Effects of Antidepressant Step  
Therapy Protocols on  
Pharmaceutical and Medical  
Utilization and Expenditures**

Tami L. Mark, Ph.D., et al. 1202

**Impact of Co-Occurring  
Posttraumatic Stress Disorder on  
Suicidal Women With Borderline  
Personality Disorder**

Melanie S. Harned, Ph.D., et al. 1210

**The Effects of Hypertension and  
Body Mass Index on Cognition in  
Schizophrenia**

Joseph I. Friedman, M.D., et al. 1232

**The Role of a Prescription in  
Anxiety Medication Use, Abuse,  
and Dependence**

Miriam C. Fenton, M.P.H., et al. 1247

**Continuing Medical Education** 1285

**October 2010**

**Volume 167 • Number 10**

Official Journal of the  
AMERICAN PSYCHIATRIC ASSOCIATION

[ajp.psychiatryonline.org](http://ajp.psychiatryonline.org)
