# get CME from AJP

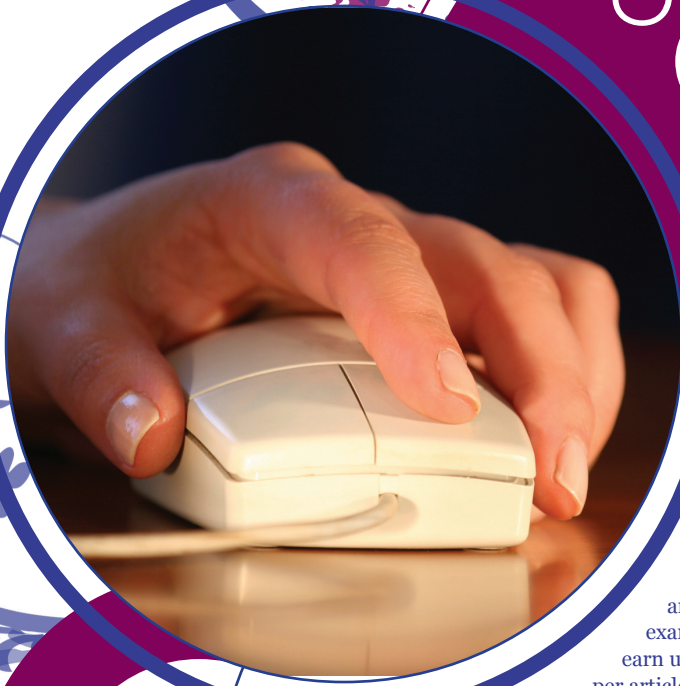

Brief companion exams are created for three of the most influential articles from each issue. By reading the articles and completing the online exams, you can test your knowledge and earn up to 1 *AMA PRA Category 1 Credit*<sup>™</sup> per article. Correct answers are highlighted for your reference upon completion of the course; there is no minimum threshold score necessary for the credit. A

link from the question to the correct answer in context will also be highlighted in the associated article, thus extending the learning experience.

CME credit is only provided online, and a subscription to the AJP CME program is required. From the moment you subscribe to the AJP CME program, you will be able to select from 72 courses from among 40 possible subject areas. You'll also be able to access the next 33 courses as they become available. For more information and pricing, please go to <http://cme.psychiatryonline.org/misc/aboutajpcme.shtml>

This activity is sponsored by the American Psychiatric Association. The American Psychiatric Association is accredited by the Accreditation Council for Continuing Medical Education to provide continuing medical education for physicians. The American Psychiatric Association designates each educational activity for a maximum of 1 *AMA PRA Category 1 Credit*<sup>™</sup>. Physicians should only claim credit commensurate with the extent of their participation in the activity.

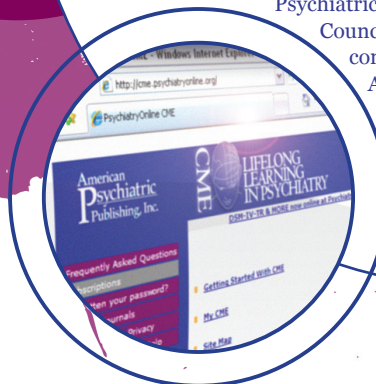

Fulfill your CME requirement while staying current on the latest advances in psychiatry.  
Subscribe to AJP CME!

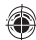

READ

# The American Journal of PSYCHIATRY

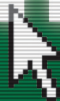

ONLINE

## ONLINE BENEFITS

### AJP in Advance

Receive key research articles posted on the AJP website well in advance of their appearance in print.

### Back Issue Access

Gain access to back issues starting with Volume 1, Issue 1 of the American Journal of Insanity in 1844. (Available to institutions as a separate one-time purchase.)

### AJP CME

Take interactive quizzes that offer AMA PRA Category 1 Credits™ for selected articles from each issue (with paid subscription to the CME Course Program).

### AJP Audio

Listen to MP3-format program summarizing findings from key articles from each issue.

### Residents' Journal

Read additional AJP articles and features that have most value to residents in their training.

### Powerful Searching

Search by author, keyword, and/or citation details—within any one journal, across the entire PsychiatryOnline journal collection, or across all HighWire journals.

### PubMed, CrossRef, and Google Scholar links

Explore everything from cited references to abstracts and full text; to similar articles; to other articles by the same lead authors.

### eTOCs

Get advanced email alerts with the table of contents of the latest issue.

ACTIVATE  
NOW!

IT'S AS EASY AS...

2 Under  
SUBSCRIBE  
NOW, click  
“Activate  
Your Online  
Access”

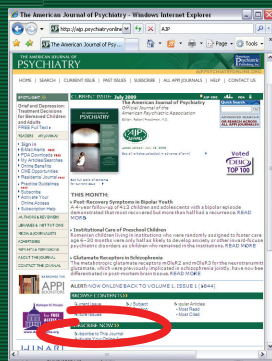

Go to [ajp.psychiatryonline.org](http://ajp.psychiatryonline.org)

3 Enter your APA Member Number. (This can be found on your mailing label.)

AJP 3000056866 CAR-RT LOT88 C-105

John Q Sample  
Mental Health Professional  
1000 Wilson Blvd STE 1825  
Arlington VA 22209-3924

01654

\*In most cases the number on your label will be your Member Number; if it is not, enter your APA Member Number (with enough leading zeros to create 10 digits).

For more information or if you cannot locate your customer number, please contact APPI Customer Service:

1.800.368.5777  
APPI@PSYCH.ORG

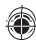

# BJPsych

## Contents

- A13 **Editorial Board**  
A15 **Highlights of this issue**

### Editorials

- 257 **How reliable are scientific studies?**  
M. R. Munafò and J. Flint
- 259 **Does cannabidiol protect against the negative effects of THC?**  
C. Henquet and R. Kuepper
- 261 **How Law 180 in Italy has reshaped psychiatry after 30 years: past attitudes, current trends and unmet needs**  
A. C. Altamura and G. M. Goodwin

### Reappraisal

- 263 **Alternative futures for the DSM revision process: iteration v. paradigm shift**  
K. S. Kendler and M. B. First

### Papers

- 266 **Treatment with antipsychotics and the risk of diabetes in clinical practice**  
L. V. Kessing, A. F. Thomsen, U. B. Mogensen and P. K. Andersen
- 272 **Effects of severe mental illness on survival of people with diabetes**  
Y. Vinogradova, C. Coupland, J. Hippisley-Cox, S. Whyte and C. Penny

- 277 **What has to be becomes – poems by doctors**  
Aarohee B. Desai

- 278 **Disability in people clinically at high risk of psychosis**  
E. Velthorst, D. H. Nieman, D. Linszen, H. Becker, L. de Haan, P. M. Dingemans, M. Birchwood, P. Patterson, R. K. R. Salokangas, M. Heinimaa, A. Heinz, G. Juckel, H. von Reventlow, P. French, H. Stevens, F. Schultze-Lutter, J. Klosterkötter and S. Ruhrmann, on behalf of the EPOS group

- 284 **Paranoia in the Psalms – psychiatry in the Old Testament**  
George Stein

- 285 **Impact of cannabidiol on the acute and psychotomimetic effects of smoked cannabis: naturalistic study**  
C. J. A. Morgan, G. Schafer, T. P. Freeman and H. V. Curran

- 291 **Cost-effectiveness of improved primary care treatment of depression in women in Chile**  
D. Siskind, R. Araya and J. Kim

- 297 **Cost-effectiveness of therapist-delivered online cognitive-behavioural therapy for depression: randomised controlled trial**  
S. Hollinghurst, T. J. Peters, S. Kaur, N. Wiles, G. Lewis and D. Kessler

- 304 **And the winner is . . . the loser – psychiatry in the movies**  
Peter Byrne

- 305 **Process, outcome and experience of transition from child to adult mental healthcare: multiperspective study**  
S. P. Singh, M. Paul, T. Ford, T. Kramer, T. Weaver, S. McLaren, K. Hovish, Z. Islam, R. Belling and S. White

- 312 **Edvard Munch (1863–1944) – in 100 words**  
Alexandra Pitman

- 313 **Psychiatric disorders in male prisoners who made near-lethal suicide attempts: case-control study**  
A. Rivlin, K. Hawton, L. Marzano and S. Fazel
- 320 **Factors influencing the decision to use hanging as a method of suicide: qualitative study**  
L. Biddle, J. Donovan, A. Owen-Smith, J. Potokar, D. Longson, K. Hawton, N. Kapur and D. Gunnell

### Short reports

- 326 **Evaluation of evidence for the psychotic subtyping of post-traumatic stress disorder**  
B. A. Gaudiano and M. Zimmerman
- 328 **Dutch politicians' coping with terrorist threat**  
M. J. Nijdam, B. P. R. Gersons and M. Olff
- 330 **Nalmefene in the treatment of pathological gambling: multicentre, double-blind, placebo-controlled study**  
J. E. Grant, B. L. Odlaug, M. N. Potenza, E. Hollander and S. W. Kim

### Columns

- 332 **Correspondence**
- 334 **Book reviews**
- 338 **Contents of *Advances in Psychiatric Treatment***
- 339 **Contents of the *American Journal of Psychiatry***
- 340 **From the Editor's desk**

### Cover picture

*Zebra and Parachute* (1930).  
Christopher Wood (1901–1930).

John Christopher (Kit) Wood was born on 7 April 1901. The son of a doctor, Wood was a strong, healthy child but developed a severe illness in his early teens that was to change his life. He became weakened and sometimes walked with a stick. Having developed some aptitude for drawing and painting during his long recovery, nursed by his devoted mother, Wood went to university to study architecture but soon left with the expressed intention of becoming a great painter. He went to Paris where he enjoyed the patronage of high society and was also introduced to opium. He came to know influential figures in the arts world including Augustus John, Picasso, Jean Cocteau, Diaghilev and Ben and Winifred Nicholson. At times he worked ceaselessly but at others his existence seems to have been almost disordered. His painting style, being mostly figurative, showed elements of various influences and changed over time but was always his own. He is perhaps most widely known for the pictures of northern France produced towards the end of his life but he was also capable of extraordinary landscapes, still life and portraiture. *Zebra and Parachute*, one of Wood's last paintings, suggests aspects of surrealism but its background is an actual place – the Paris house of the architect Charles-Edouard Jeanneret-Gris, Le Corbusier. Set against this is the exquisitely painted and exotic figure of the zebra and skyward, the descending, apparently dead, parachutist. How Wood's painting might have developed can only be a matter of conjecture. He had continued to use opium, initially as a source of inspiration perhaps but then as a matter of necessity. He developed a paranoid illness possibly related to withdrawal. Kit Wood died at Salisbury railway station on 21 August 1930, the inquest concluding that he had thrown himself in front of a train.

Text by Martin Humphreys. Image © Tate, London 2010.

We are always looking for interesting and visually appealing images for the cover of the *Journal* and would welcome suggestions or pictures, which should be sent to Dr Allan Beveridge, British Journal of Psychiatry, 17 Belgrave Square, London SW1X 8PG, UK or [bjp@rcpsych.ac.uk](mailto:bjp@rcpsych.ac.uk).

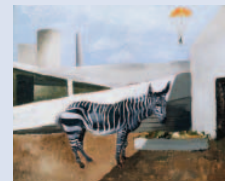

# The Residents' JOURNAL

Last Issue's

## Table of Contents

- 1 Resident Physician Writing and Publishing  
Joseph M. Cerimele, M.D.
- 2 Editorial  
Joseph M. Cerimele, M.D.
- 3 Publishing as a Resident  
Anna Yusim, M.D.
- 5 Power of a Name: The Stigma of "Schizophrenia"  
Misty Charissa Richards, M.S.; Michael Choi, M.D.
- 7 Acute Psychomotor Agitation in a Patient With Schizophrenia and Alcohol Dependence  
Sarah M. Fayad, M.D.; Joseph M. Cerimele, M.D.
- 9 Author Information for Residents' Journal Submissions

The Residents' Journal is sent free-of-charge to all psychiatry residents. Anyone interested in being included on the distribution list should contact Angela Moore, the Residents' Journal staff editor at [ajp@psych.org](mailto:ajp@psych.org) with "Subscribe to Residents' Journal" in the subject line.

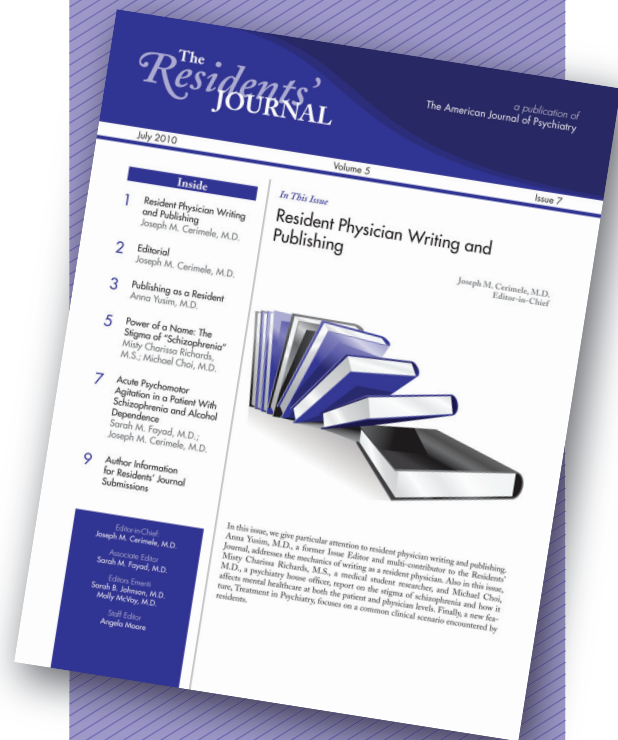

Upcoming Issue Themes  
September: Research  
October: Specialists in Psychiatry

a publication of  
The American Journal of Psychiatry

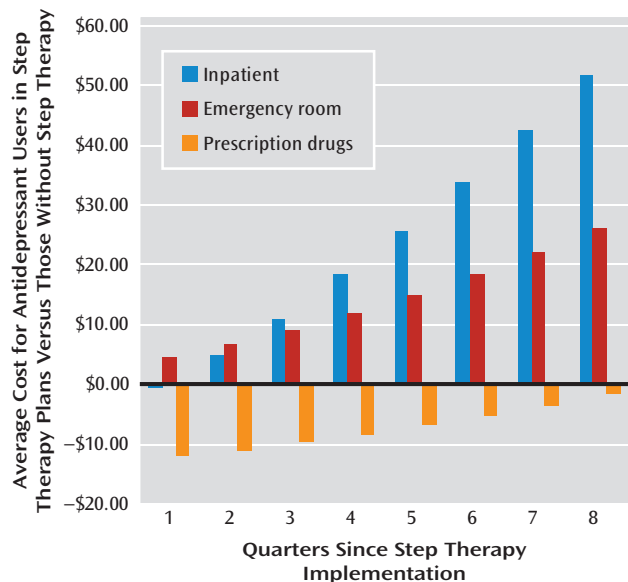

Costs increased both in general and for mental health conditions specifically with step therapy (Mark et al., p. 1202)

### Step Therapy Savings on Antidepressants Are Offset by Higher Medical Spending

Requiring initial use of a lower-cost antidepressant before approval of a more expensive one, i.e., “step therapy,” decreases the cost of antidepressant drugs initially but is accompanied by increased expenses for inpatient and emergency room treatment. Mark et al. (p. 1202) compared health care expenditures for antidepressant users employed by two large companies using step therapy and by two compa-

nies without it. Not only did step therapy result in higher total payments to providers soon after implementation of step therapy, the difference increased over the next 2 years. During the same period, the advantage in prescription drug spending decreased. Dr. John Greden points out in an editorial (p. 1148) that requirements such as step therapy result in lower adherence to prescribed treatments.

### Clinical Guidance: Antipsychotic Treatment of Delirium in Severely Ill Children

Children under 5 years of age in the pediatric intensive care unit may develop delirium as a consequence of the presence and treatment of severe medical illnesses. Silver et al. (CME, p. 1172) illustrate the evaluation and treatment of delirium in this age group with the case of an 8-month-old girl. Symptoms, which

include disorientation, agitated behavior, and failure to respond to parents, can be rated on the Pediatric Anesthesia Emergence Delirium Scale. Intravenous haloperidol (0.05 to 0.15 mg/kg daily in divided doses) can be used if cardiac risk is not present. Second-generation antipsychotics are also recommended.

### Clinical Guidance: Suicide in Women With Borderline Personality Disorder and PTSD

Flashbacks from childhood or adult sexual trauma can trigger suicidal and nonsuicidal self-injurious behavior in chronically suicidal women with co-occurring borderline personality disorder and PTSD, according to Harned et al. (p. 1210). Use of the behavior for interpersonal needs, emotional numbing from the PTSD, and comorbid panic disorder possibly contribute to these behaviors. Treatment should be directed toward reducing trauma cue reactivity, as well as developing tolerance skills and substituting alternative, nonharmful behaviors. In an editorial (p. 1152), Dr. Burr Eichelman notes that this study provides evidence that PTSD causes psychopathology that is distinct from borderline personality disorder.

### Clinical Guidance: Hypertension and Increased Body Mass Index Affect Cognition in Schizophrenia

Hypertension and increased body mass index, common concomitants of the weight gain induced by antipsychotic medications, are associated with decreased immediate and delayed memory in schizophrenia. Friedman et al. (CME, p. 1232) found that these neurocognitive deficits are associated with decreased psychosocial function in patients with schizophrenia. Addressing hypertension and obesity in patients may therefore improve disabling neurocognitive deficits that are not otherwise amenable to treatment. Dr. Henry Nasrallah states in an editorial (p. 1155) that prevention of weight loss is critical for optimal therapeutic response for schizophrenia.

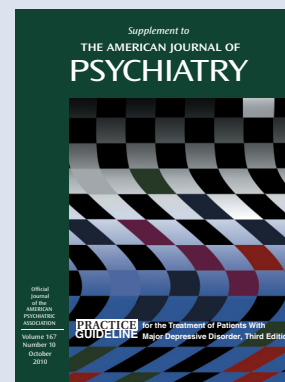

Part A of APA's Major Depressive Disorder Practice Guideline accompanies this issue as a supplement

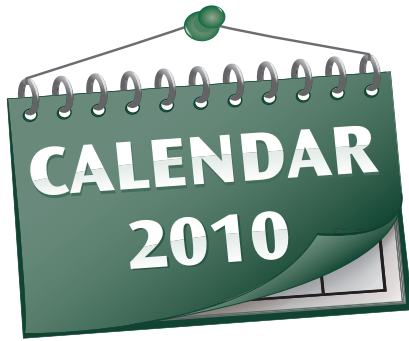

For free listing of your organization's official annual or regional meeting, please send us the following information: sponsor, location, inclusive dates, type and number of continuing education credits (if available), and the name, address, and telephone number of the person or group to contact for more information. In order for an event to appear in our listing, all notices and changes must be received at least 6 months in advance of the meeting and should be addressed to:

**Calendar, American Journal of Psychiatry, 1000 Wilson Boulevard, Suite 1825, Arlington, VA 22209-3901, [ajp@psych.org](mailto:ajp@psych.org) (e-mail).**

Because of space limitations, only listings of meetings of the greatest interest to Journal readers will be included.

## OCTOBER

**October 14–17**, 62nd Institute on Psychiatric Services, American Psychiatric Association, Boston, MA. Contact: Jill Gruber, APA Annual Meetings Dept., 1000 Wilson Blvd., Ste. 1825, Arlington, VA 22209; (703) 907-7815.

**October 22–24**, International Conference on Schizophrenia: ICONS IV, Chennai, India. Contact: Dr.R.Thara, Director, SCARF INDIA, [scarf@vsnl.com](mailto:scarf@vsnl.com), [info@icons-scarf.org](mailto:info@icons-scarf.org) (e-mail).

**October 26–31**, 57th Annual Meeting of the American Academy of Child and Adolescent Psychiatry, New York, NY. Contact: AACAP, 3615 Wisconsin Avenue, N.W., Washington, DC 20016-3007; (202) 966-7300 (tel), (202) 966-2891 (fax), [meetings@aacap.org](mailto:meetings@aacap.org) (e-mail), [www.aacap.org](http://www.aacap.org) (web site).

## MAY 2011

**May 12–14**, 55th Annual Meeting of the American Academy of Psychoanalysis and Dynamic Psychiatry. Contact: AAPDP Executive Office, P.O. Box 30, Bloomfield, CT 06002; (888) 691-8281 (tel), (860) 286-0787 (fax), [info@aapdp.org](mailto:info@aapdp.org) (e-mail), [www.aapdp.org](http://www.aapdp.org) (web site).

**May 14–19**, 164th Annual Meeting of the American Psychiatric Association, Honolulu, HI. Contact: Cathy Nash, APA Annual Meetings Dept., 1000 Wilson Blvd., Ste. 1825, Arlington, VA 22209; (703) 907-7822.

**May 26–29**, 3rd International Congress on ADHD – From Childhood to Adult Disease, Berlin, Germany. Contact: Congress and Exhibition Office: CPO HANSER SERVICE, 011-49-40-670 88 20 (tel), [www.adhd-congress.org](http://www.adhd-congress.org) (web site), [adhd2011@cpo-hanser.de](mailto:adhd2011@cpo-hanser.de) (e-mail).

## OCTOBER

**October 5–8**, II International Congress, Dual Disorders, Addictive Behaviors and other Mental Disorders, Barcelona, Spain. Contact: SEPD, [www.cipd2011.com](http://www.cipd2011.com) (web site).

**October 18–23**, 58th Annual Meeting of the American Academy of Child and Adolescent Psychiatry, Toronto, Ontario. Contact: AACAP, 3615 Wisconsin Avenue, N.W., Washington, DC 20016-3007; (202) 966-7300 (tel), (202) 966-2891 (fax), [meetings@aacap.org](mailto:meetings@aacap.org) (e-mail), [www.aacap.org](http://www.aacap.org) (web site).

**October 27–30**, 63rd Institute on Psychiatric Services, American Psychiatric Association, San Francisco, CA. Contact: Jill Gruber, APA Annual Meetings Dept., 1000 Wilson Blvd., Ste. 1825, Arlington, VA 22209; (703) 907-7815.

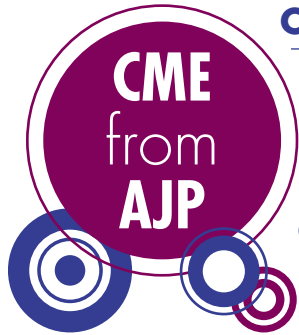

## Continuing Medical Education

Three articles in this issue form the basis of a short course with questions that can be answered for up to 1 *AMA PRA Category 1 Credit™* each by visiting <http://cme.psychiatryonline.org/> and clicking on “American Journal of Psychiatry CME.”

CME credit is issued only online, and a paid subscription to the AJP CME course program is required.

This month’s courses appear on pages 1285–1288.

FREE AUDIO!

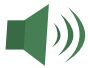

## Have You Heard?

You can listen to highlights of *The American Journal of Psychiatry* by downloading a monthly free .mp3 audio file from our web site (<http://ajp.psychiatryonline.org/misc/audio.dtl>) or by subscribing to the AJP Audio podcast at iTunes or other feed reader (e.g., NewzCrawler, FeedDemon, Bloglines, Google Reader). Presented by Deputy Editor Dr. Susan Schultz or by Editorial Director Michael Roy, each month’s audio lasts approximately 30 minutes and covers several research articles, the Treatment in Psychiatry feature, and one or two editorials.

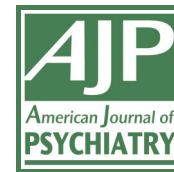

Coming in the November 2010 issue\*

## THE AMERICAN JOURNAL OF PSYCHIATRY

### *Problem-Solving Therapy and Supportive Therapy in Older Adults With Major Depression and Executive Dysfunction*

P.A. Areán, P. Raue, R.S. Mackin, D. Kanellopoulos, C. McCulloch, and G.S. Alexopoulos

### *Association Between a High-Risk Autism Locus on 5p14 and Social Communication Spectrum Phenotypes in the General Population*

B. St. Pourcain, K. Wang, J.T. Glessner, J. Golding, C. Steer, S.M. Ring, D.H. Skuse, S.F.A. Grant, H. Hakonarson, and G. Davey Smith

### *Family History of Alzheimer’s Disease and Hippocampal Structure in Healthy People*

M. Donix, A.C. Burggren, N.A. Suthana, P. Siddarth, A.D. Ekstrom, A.K. Krupa, M. Jones, L. Martin-Harris, L.M. Ercoli, K.J. Miller, G.W. Small, and S.Y. Bookheimer

### *The Genetics of Autism Spectrum Disorders and Related Neuropsychiatric Disorders in Childhood*

P. Lichtenstein, E. Carlström, M. Råstam, C. Gillberg, and H. Anckarsäter

\*Can’t wait? Visit [ajp.psychiatryonline.org](http://ajp.psychiatryonline.org) and click the “AJP in Advance” logo to see all articles uploaded in advance of print!
